# Supplementary material for: YTHDF1’s Regulatory Involvement in Breast Cancer Prognosis, Immunity, and the ceRNA Network
Source: MDPI journal article supplement (doi:10.3390/ijms25031879), 2024-02-04
Supplement: s1 [file s1]

**Table S1.** The nucleotide sequence of Negative control, siNC, siRNA of YTHDF1, and miR378g mimics/inhibitor.

| <b>Name</b>       | <b>Sequence (5'-3')</b>                        |
|-------------------|------------------------------------------------|
| Negative control  | UUCUCCGAACGUGUCACGUTT<br>ACGUGACACGUUCGGAGAATT |
| siNC              | UUCUCCGAACGUGUCACGUTT<br>ACGUGACACGUUCGGAGAATT |
| siYTHDF1          | GCUCAACCGCAGUAUCAGATT<br>UCUGAUACUGCGGUUGAGCTT |
| miR378g mimics    | ACUGGGCUUGGAGUCAGAAG<br>UCUGACUCCAAGCCCAGUUU   |
| miR378g inhibitor | CUUCUGACUCCAAGCCCAGU                           |
